# Supplementary material for: A novel nonenzymatic glucose sensor based on magnetic copper ferrite immobilized on multiwalled carbon nanotubes
Source: Royal Society of Chemistry journal article supplement (doi:10.1039/c4ay02731k), 2015-01-01
Supplement: c4ay02731k1.pdf [file c4ay02731k1.pdf]

## Supporting Information

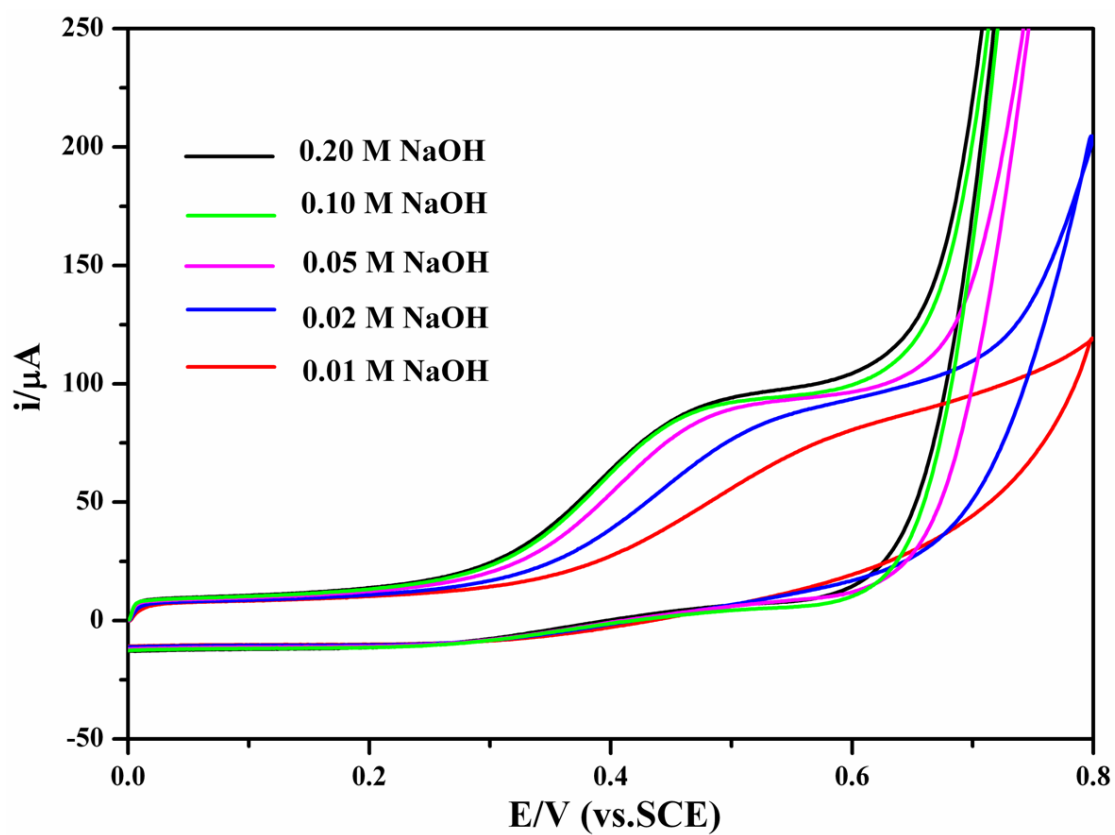

Fig.S1 Cyclic voltammograms of CuFe<sub>2</sub>O<sub>4</sub>-MWCNTs/GCE in different concentrations of NaOH solutions with 1.0 mM Glucose at 100 mV s<sup>-1</sup>.

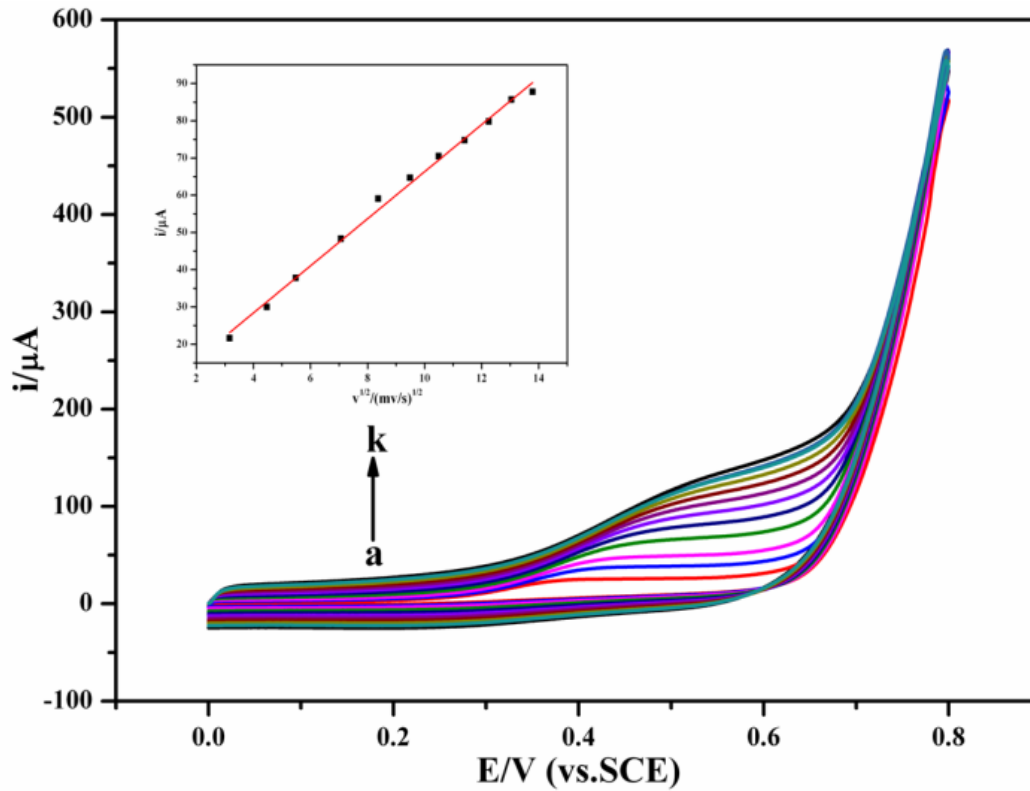

Fig.S2 Cyclic voltammograms of CuFe<sub>2</sub>O<sub>4</sub>-MWCNTs/GCE in 0.10 M NaOH containing 1 mM glucose at different scan rates ranging from 10 to 190 mV s<sup>-1</sup> (from a to k). Inset is the plot of oxidation peak current with the square root of scan rate.
